# Supplementary material for: Focus group-supported development and psychometric exploration of an instrument to assess perceived physical exertion in nursing students
Source: PubMed Central journal article supplement (PMC11687016; doi:10.1186/s12912-024-02639-9), 2024-12-30

Methods to determine the factor number:

**Table 1: Eigenvalue**

| <b>Explained total variance</b> |                     |               |             |                                                |               |             |
|---------------------------------|---------------------|---------------|-------------|------------------------------------------------|---------------|-------------|
| Factor                          | Initial Eigenvalues |               |             | Sums of squared factor loadings for extraction |               |             |
|                                 | Total               | % of variance | Cumulated % | Total                                          | % of variance | Cumulated % |
| 1                               | 14.217              | 47.390        | 47.390      | 13.908                                         | 46.360        | 46.360      |
| 2                               | 3.533               | 11.778        | 59.168      | 3.191                                          | 10.638        | 56.998      |
| 3                               | 1.333               | 4.442         | 63.609      | .999                                           | 3.329         | 60.327      |
| 4                               | 1.148               | 3.827         | 67.437      | .805                                           | 2.682         | 63.009      |
| 5                               | 1.005               | 3.349         | 70.786      | .720                                           | 2.401         | 65.410      |
| 6                               | .896                | 2.987         | 73.772      |                                                |               |             |
| 7                               | .824                | 2.748         | 76.520      |                                                |               |             |
| 8                               | .740                | 2.466         | 78.987      |                                                |               |             |
| 9                               | .624                | 2.079         | 81.065      |                                                |               |             |
| 10                              | .539                | 1.797         | 82.863      |                                                |               |             |
| 11                              | .517                | 1.723         | 84.586      |                                                |               |             |
| 12                              | .504                | 1.679         | 86.265      |                                                |               |             |
| 13                              | .434                | 1.448         | 87.713      |                                                |               |             |
| 14                              | .375                | 1.251         | 88.964      |                                                |               |             |
| 15                              | .357                | 1.189         | 90.154      |                                                |               |             |
| 16                              | .343                | 1.144         | 91.297      |                                                |               |             |
| 17                              | .323                | 1.078         | 92.375      |                                                |               |             |
| 18                              | .309                | 1.031         | 93.406      |                                                |               |             |
| 19                              | .280                | .932          | 94.338      |                                                |               |             |
| 20                              | .251                | .836          | 95.174      |                                                |               |             |
| 21                              | .222                | .741          | 95.914      |                                                |               |             |
| 22                              | .209                | .698          | 96.612      |                                                |               |             |
| 23                              | .191                | .638          | 97.250      |                                                |               |             |
| 24                              | .171                | .571          | 97.820      |                                                |               |             |
| 25                              | .156                | .521          | 98.342      |                                                |               |             |
| 26                              | .136                | .455          | 98.797      |                                                |               |             |
| 27                              | .128                | .427          | 99.224      |                                                |               |             |
| 28                              | .099                | .331          | 99.555      |                                                |               |             |
| 29                              | .070                | .234          | 99.789      |                                                |               |             |
| 30                              | .063                | .211          | 100.000     |                                                |               |             |

Extraction method: Principal Axis Factoring

Figure 1: Scree Plot

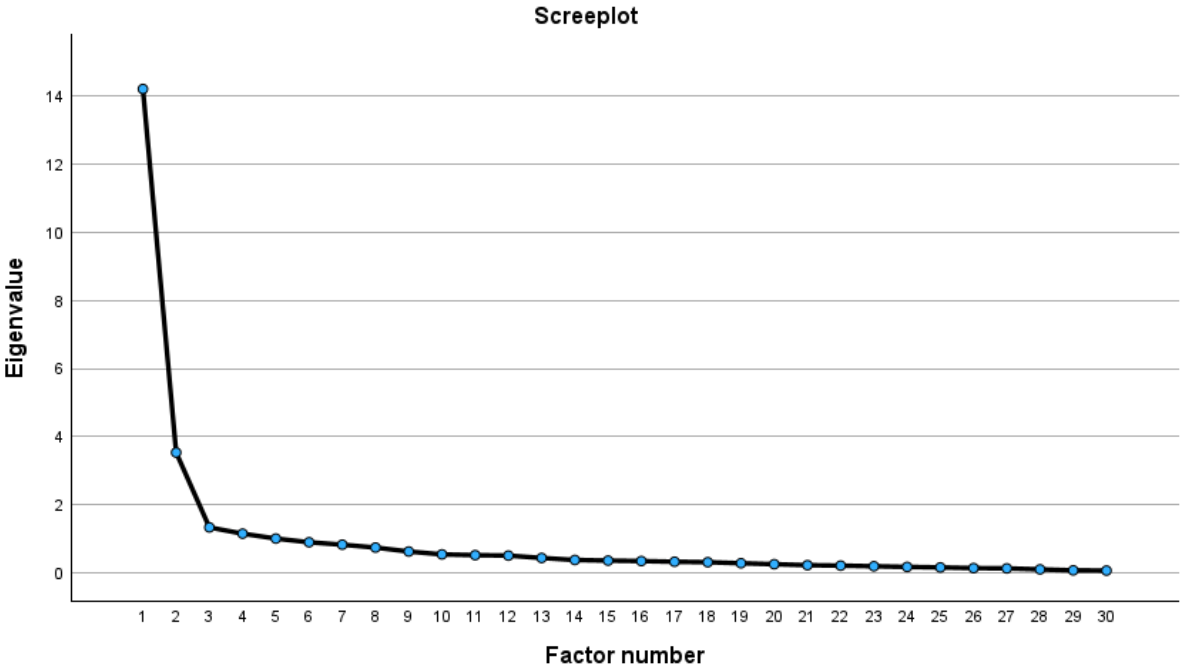

### Velicer's MAP Test:

Run MATRIX procedure:

Velicer's Minimum Average Partial (MAP) Test:

#### Eigenvalues

14.2169  
3.5334  
1.3325  
1.1481  
1.0047  
.8960  
.8244  
.7399  
.6236  
.5392  
.5170  
.5037  
.4345  
.3752  
.3568  
.3431  
.3233  
.3093  
.2796  
.2509  
.2222  
.2093  
.1913  
.1712  
.1563  
.1365  
.1282  
.0992  
.0703  
.0634

#### Average Partial Correlations

|         | squared | power4 |
|---------|---------|--------|
| .0000   | .2219   | .0808  |
| 1.0000  | .0355   | .0046  |
| 2.0000  | .0209   | .0016  |
| 3.0000  | .0186   | .0012  |
| 4.0000  | .0186   | .0011  |
| 5.0000  | .0209   | .0020  |
| 6.0000  | .0226   | .0018  |
| 7.0000  | .0235   | .0020  |
| 8.0000  | .0251   | .0023  |
| 9.0000  | .0270   | .0035  |
| 10.0000 | .0302   | .0040  |

|         |        |        |
|---------|--------|--------|
| 11.0000 | .0327  | .0061  |
| 12.0000 | .0353  | .0062  |
| 13.0000 | .0398  | .0076  |
| 14.0000 | .0458  | .0102  |
| 15.0000 | .0519  | .0125  |
| 16.0000 | .0598  | .0143  |
| 17.0000 | .0701  | .0177  |
| 18.0000 | .0802  | .0205  |
| 19.0000 | .0883  | .0266  |
| 20.0000 | .1085  | .0385  |
| 21.0000 | .1280  | .0484  |
| 22.0000 | .1506  | .0613  |
| 23.0000 | .1790  | .0711  |
| 24.0000 | .1852  | .0771  |
| 25.0000 | .2126  | .1041  |
| 26.0000 | .2665  | .1402  |
| 27.0000 | .3153  | .1855  |
| 28.0000 | .4843  | .3584  |
| 29.0000 | 1.0000 | 1.0000 |

The smallest average squared partial correlation is  
.0186

The smallest average 4rth power partial correlation is  
.0011

The Number of Components According to the Original (1976) MAP Test is  
3

The Number of Components According to the Revised (2000) MAP Test is  
4

**Figure 2: Parallel analysis PAA**

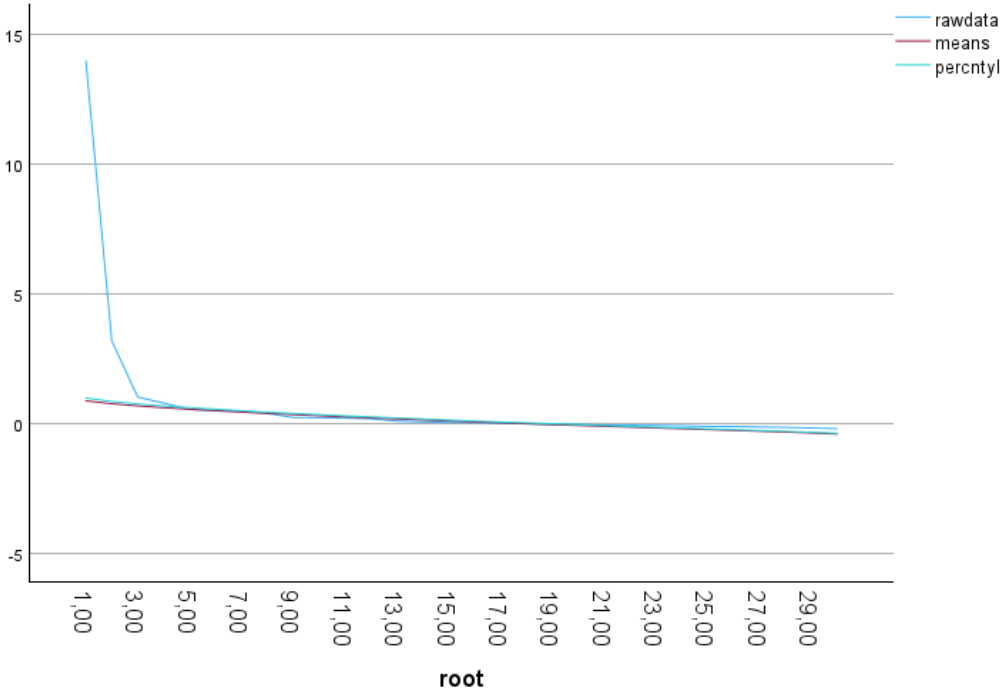

**Figure 3: Parallel analysis PCA**

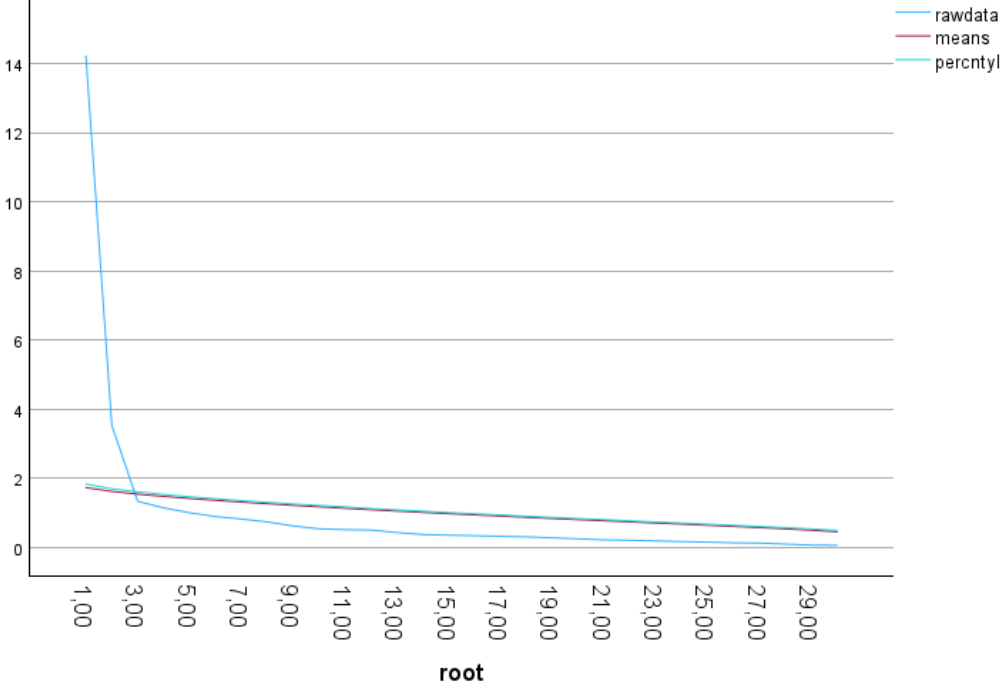

**Table 2:** Chi Quadrat (ML-Test):

| Factors | df  | Chi <sup>2</sup> | p     |
|---------|-----|------------------|-------|
| 2       | 376 | 1430.76          | <.001 |
| 3       | 348 | 1137.98          | <.001 |
| 4       | 321 | 926.34           | <.001 |
| 5       | 295 | 803.71           | <.001 |
| 6       | 270 | 705.03           | <.001 |
| 7       | 246 | 589.98           | <.001 |
| 8       | 223 | 491.72           | <.001 |
| 9       | 201 | 400.52           | <.001 |
| 10      | 180 | 320.99           | <.001 |
| 11      | 160 | 260.68           | <.001 |
| 12      | 141 | 210.12           | <.001 |
| 13      | 123 | 164,,3           | .007  |
| 14      | 106 | 136.14           | .026  |
| 15      | 90  | 95.3             | .331  |

From factor 4 on with Promax rotation

**Figure 4:** EKC

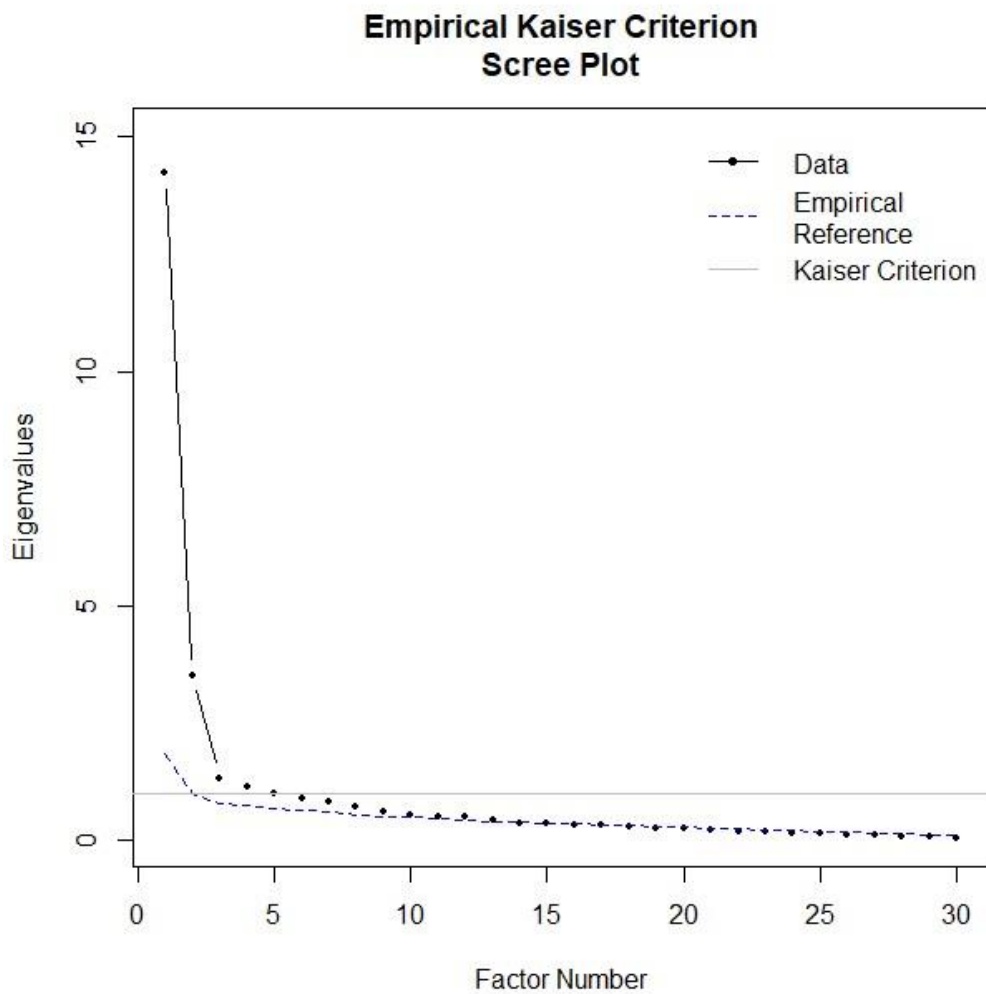

Supplement: 12912_2024_2639_MOESM4_ESM.pdf [file 12912_2024_2639_MOESM4_ESM.pdf]
