# Supplementary material for: Focus group-supported development and psychometric exploration of an instrument to assess perceived physical exertion in nursing students
Source: PubMed Central journal article supplement (PMC11687016; doi:10.1186/s12912-024-02639-9), 2024-12-30
Supplement: 12912_2024_2639_MOESM1_ESM.pdf [file 12912_2024_2639_MOESM1_ESM.pdf]

Questions of the questionnaire that were reduced after the third focus group interview

| Original (German) Item                                                                    | English-translated Item                                                  |
|-------------------------------------------------------------------------------------------|--------------------------------------------------------------------------|
| <b>Work-related Items</b>                                                                 |                                                                          |
| Sie laufen in einer Notfallsituation schnell über die Station.                            | You are running fast across the ward in an emergency situation.          |
| Sie fixieren mit einer anderen Pflegekraft eine Patientin (ca. 80 kg) mit Gurten am Bett. | You and another nurse are strapping a patient (approx. 80 kg) to the bed |
| Sie unterstützen eine Patientin bei der Essenseinnahme.                                   | You are helping a patient with food intake                               |
| Sie gehen ohne zusätzliche Last über die Station.                                         | You are walking across the ward without any additional load              |
| <b>School-related Items</b>                                                               |                                                                          |
| Sie stehen 15 Minuten lang auf einer Stelle (z.B. in der Pause).                          | You are standing in one place for 15 minutes (e.g., during break)        |
