# Supplementary material for: Focus group-supported development and psychometric exploration of an instrument to assess perceived physical exertion in nursing students
Source: PubMed Central journal article supplement (PMC11687016; doi:10.1186/s12912-024-02639-9), 2024-12-30
Supplement: 12912_2024_2639_MOESM2_ESM.pdf [file 12912_2024_2639_MOESM2_ESM.pdf]

Questionnaire in German language

| Stellen Sie sich folgende Tätigkeiten im Pflegealltag vor:                                                                | Wie sehr beansprucht Sie das körperlich? |                                      |                                      |                                      |                                      |                                      |
|---------------------------------------------------------------------------------------------------------------------------|------------------------------------------|--------------------------------------|--------------------------------------|--------------------------------------|--------------------------------------|--------------------------------------|
|                                                                                                                           | gar nicht                                |                                      |                                      |                                      | stark                                | keine Angabe                         |
| Sie positionieren eine immobile Patientin (ca. 80 kg) ohne ihre Unterstützung im Bett.                                    | <input type="radio"/> O <sub>0</sub>     | <input type="radio"/> O <sub>1</sub> | <input type="radio"/> O <sub>2</sub> | <input type="radio"/> O <sub>3</sub> | <input type="radio"/> O <sub>4</sub> | <input type="radio"/> O <sub>9</sub> |
| Sie positionieren einen immobilen Patienten mit Adipositas (ca. 120 kg) ohne seine Unterstützung im Bett.                 | <input type="radio"/> O <sub>0</sub>     | <input type="radio"/> O <sub>1</sub> | <input type="radio"/> O <sub>2</sub> | <input type="radio"/> O <sub>3</sub> | <input type="radio"/> O <sub>4</sub> | <input type="radio"/> O <sub>9</sub> |
| Sie mobilisieren eine immobile Patientin (ca. 80 kg) ohne ihre Unterstützung vom Bett in den Rollstuhl.                   | <input type="radio"/> O <sub>0</sub>     | <input type="radio"/> O <sub>1</sub> | <input type="radio"/> O <sub>2</sub> | <input type="radio"/> O <sub>3</sub> | <input type="radio"/> O <sub>4</sub> | <input type="radio"/> O <sub>9</sub> |
| Sie mobilisieren einen teilmobilen Patienten (ca. 80 kg) mit seiner Unterstützung vom Bett in den Rollstuhl.              | <input type="radio"/> O <sub>0</sub>     | <input type="radio"/> O <sub>1</sub> | <input type="radio"/> O <sub>2</sub> | <input type="radio"/> O <sub>3</sub> | <input type="radio"/> O <sub>4</sub> | <input type="radio"/> O <sub>9</sub> |
| Sie mobilisieren eine teilmobile Patientin mit Adipositas (ca. 120 kg) mit ihrer Unterstützung vom Bett in den Rollstuhl. | <input type="radio"/> O <sub>0</sub>     | <input type="radio"/> O <sub>1</sub> | <input type="radio"/> O <sub>2</sub> | <input type="radio"/> O <sub>3</sub> | <input type="radio"/> O <sub>4</sub> | <input type="radio"/> O <sub>9</sub> |
| Sie mobilisieren eine teilmobile Patientin (ca. 80 kg) nach einem Sturz mit einer zweiten Pflegekraft vom Boden ins Bett. | <input type="radio"/> O <sub>0</sub>     | <input type="radio"/> O <sub>1</sub> | <input type="radio"/> O <sub>2</sub> | <input type="radio"/> O <sub>3</sub> | <input type="radio"/> O <sub>4</sub> | <input type="radio"/> O <sub>9</sub> |
| Sie waschen einen immobilen Patienten (ca. 80 kg) ohne seine Unterstützung im Bett.                                       | <input type="radio"/> O <sub>0</sub>     | <input type="radio"/> O <sub>1</sub> | <input type="radio"/> O <sub>2</sub> | <input type="radio"/> O <sub>3</sub> | <input type="radio"/> O <sub>4</sub> | <input type="radio"/> O <sub>9</sub> |
| Sie waschen eine immobile Patientin mit Adipositas (ca. 120 kg) ohne ihre Unterstützung im Bett.                          | <input type="radio"/> O <sub>0</sub>     | <input type="radio"/> O <sub>1</sub> | <input type="radio"/> O <sub>2</sub> | <input type="radio"/> O <sub>3</sub> | <input type="radio"/> O <sub>4</sub> | <input type="radio"/> O <sub>9</sub> |
| Sie unterstützen einen teilmobilen Patienten (ca. 80 kg) bei der Körperpflege in einem engen Bad.                         | <input type="radio"/> O <sub>0</sub>     | <input type="radio"/> O <sub>1</sub> | <input type="radio"/> O <sub>2</sub> | <input type="radio"/> O <sub>3</sub> | <input type="radio"/> O <sub>4</sub> | <input type="radio"/> O <sub>9</sub> |
| Sie entleeren nacheinander den Dauerkatheter bei 8 Patientinnen und Patienten.                                            | <input type="radio"/> O <sub>0</sub>     | <input type="radio"/> O <sub>1</sub> | <input type="radio"/> O <sub>2</sub> | <input type="radio"/> O <sub>3</sub> | <input type="radio"/> O <sub>4</sub> | <input type="radio"/> O <sub>9</sub> |
| Sie ziehen einer Patientin (ca. 80 kg) im Bett Kompressionsstümpfe an.                                                    | <input type="radio"/> O <sub>0</sub>     | <input type="radio"/> O <sub>1</sub> | <input type="radio"/> O <sub>2</sub> | <input type="radio"/> O <sub>3</sub> | <input type="radio"/> O <sub>4</sub> | <input type="radio"/> O <sub>9</sub> |
| Sie reinigen die Wunde eines Patienten (ca. 80 kg) an einer schwierig zu erreichenden Stelle (z. B. Wade, Gesäß).         | <input type="radio"/> O <sub>0</sub>     | <input type="radio"/> O <sub>1</sub> | <input type="radio"/> O <sub>2</sub> | <input type="radio"/> O <sub>3</sub> | <input type="radio"/> O <sub>4</sub> | <input type="radio"/> O <sub>9</sub> |
| Sie wechseln den Verband am Bein einer Patientin (ca. 80 kg) und halten dabei das Bein hoch.                              | <input type="radio"/> O <sub>0</sub>     | <input type="radio"/> O <sub>1</sub> | <input type="radio"/> O <sub>2</sub> | <input type="radio"/> O <sub>3</sub> | <input type="radio"/> O <sub>4</sub> | <input type="radio"/> O <sub>9</sub> |
| Sie messen nacheinander bei 20 Patientinnen und Patienten den Blutdruck.                                                  | <input type="radio"/> O <sub>0</sub>     | <input type="radio"/> O <sub>1</sub> | <input type="radio"/> O <sub>2</sub> | <input type="radio"/> O <sub>3</sub> | <input type="radio"/> O <sub>4</sub> | <input type="radio"/> O <sub>9</sub> |
| Sie stecken nacheinander bei 20 Patientinnen und Patienten Infusionen an und ab.                                          | <input type="radio"/> O <sub>0</sub>     | <input type="radio"/> O <sub>1</sub> | <input type="radio"/> O <sub>2</sub> | <input type="radio"/> O <sub>3</sub> | <input type="radio"/> O <sub>4</sub> | <input type="radio"/> O <sub>9</sub> |
| Sie stellen die Medikamente für 20 Patientinnen und Patienten.                                                            | <input type="radio"/> O <sub>0</sub>     | <input type="radio"/> O <sub>1</sub> | <input type="radio"/> O <sub>2</sub> | <input type="radio"/> O <sub>3</sub> | <input type="radio"/> O <sub>4</sub> | <input type="radio"/> O <sub>9</sub> |

|                                                                                                          |                                      |                                      |                                      |                                      |                                      |                                      |
|----------------------------------------------------------------------------------------------------------|--------------------------------------|--------------------------------------|--------------------------------------|--------------------------------------|--------------------------------------|--------------------------------------|
| Sie beziehen innerhalb von 5 Minuten ein leeres Bett neu.                                                | <input type="radio"/> O <sub>0</sub> | <input type="radio"/> O <sub>1</sub> | <input type="radio"/> O <sub>2</sub> | <input type="radio"/> O <sub>3</sub> | <input type="radio"/> O <sub>4</sub> | <input type="radio"/> O <sub>9</sub> |
| Sie desinfizieren innerhalb von 2 Minuten die Oberflächen eines Zimmers (z. B. Fernseher, Patientenruf). | <input type="radio"/> O <sub>0</sub> | <input type="radio"/> O <sub>1</sub> | <input type="radio"/> O <sub>2</sub> | <input type="radio"/> O <sub>3</sub> | <input type="radio"/> O <sub>4</sub> | <input type="radio"/> O <sub>9</sub> |
| Sie stehen 20 Minuten lang auf einer Stelle (z. B. im OP, beim Dokumentieren).                           | <input type="radio"/> O <sub>0</sub> | <input type="radio"/> O <sub>1</sub> | <input type="radio"/> O <sub>2</sub> | <input type="radio"/> O <sub>3</sub> | <input type="radio"/> O <sub>4</sub> | <input type="radio"/> O <sub>9</sub> |
| Sie steigen die Treppe über 2 Stockwerke hinauf.                                                         | <input type="radio"/> O <sub>0</sub> | <input type="radio"/> O <sub>1</sub> | <input type="radio"/> O <sub>2</sub> | <input type="radio"/> O <sub>3</sub> | <input type="radio"/> O <sub>4</sub> | <input type="radio"/> O <sub>9</sub> |
| Sie transportieren Gegenstände bis zu 5 kg (z. B. Tee, Handtücher, Essenstabletts) über die Station.     | <input type="radio"/> O <sub>0</sub> | <input type="radio"/> O <sub>1</sub> | <input type="radio"/> O <sub>2</sub> | <input type="radio"/> O <sub>3</sub> | <input type="radio"/> O <sub>4</sub> | <input type="radio"/> O <sub>9</sub> |
| Sie transportieren Gegenstände über 5 kg (z. B. Gepäck eines Patienten) von einer Station zur nächsten.  | <input type="radio"/> O <sub>0</sub> | <input type="radio"/> O <sub>1</sub> | <input type="radio"/> O <sub>2</sub> | <input type="radio"/> O <sub>3</sub> | <input type="radio"/> O <sub>4</sub> | <input type="radio"/> O <sub>9</sub> |
| Sie schieben ein leeres Bett über die Station.                                                           | <input type="radio"/> O <sub>0</sub> | <input type="radio"/> O <sub>1</sub> | <input type="radio"/> O <sub>2</sub> | <input type="radio"/> O <sub>3</sub> | <input type="radio"/> O <sub>4</sub> | <input type="radio"/> O <sub>9</sub> |
| Sie schieben einen Patienten im Rollstuhl von einer Station zur nächsten.                                | <input type="radio"/> O <sub>0</sub> | <input type="radio"/> O <sub>1</sub> | <input type="radio"/> O <sub>2</sub> | <input type="radio"/> O <sub>3</sub> | <input type="radio"/> O <sub>4</sub> | <input type="radio"/> O <sub>9</sub> |
| Sie heben Gegenstände bis zu 5 kg (z. B. Karton mit Medikamenten) hoch.                                  | <input type="radio"/> O <sub>0</sub> | <input type="radio"/> O <sub>1</sub> | <input type="radio"/> O <sub>2</sub> | <input type="radio"/> O <sub>3</sub> | <input type="radio"/> O <sub>4</sub> | <input type="radio"/> O <sub>9</sub> |
| Sie heben Gegenstände über 5 kg (z. B. Spüllösungen, Sauerstoffflaschen) hoch.                           | <input type="radio"/> O <sub>0</sub> | <input type="radio"/> O <sub>1</sub> | <input type="radio"/> O <sub>2</sub> | <input type="radio"/> O <sub>3</sub> | <input type="radio"/> O <sub>4</sub> | <input type="radio"/> O <sub>9</sub> |
| Sie halten Gegenstände bis zu 5 kg (z. B. Infusionsbeutel) über einen Zeitraum von 1 Minute.             | <input type="radio"/> O <sub>0</sub> | <input type="radio"/> O <sub>1</sub> | <input type="radio"/> O <sub>2</sub> | <input type="radio"/> O <sub>3</sub> | <input type="radio"/> O <sub>4</sub> | <input type="radio"/> O <sub>9</sub> |
| Sie halten Gegenstände über 5 kg (z. B. Spüllösungen) über einen Zeitraum von 1 Minute.                  | <input type="radio"/> O <sub>0</sub> | <input type="radio"/> O <sub>1</sub> | <input type="radio"/> O <sub>2</sub> | <input type="radio"/> O <sub>3</sub> | <input type="radio"/> O <sub>4</sub> | <input type="radio"/> O <sub>9</sub> |

| Stellen Sie sich folgende Tätigkeiten im Schulalltag vor:                                                               | Wie sehr beansprucht Sie das körperlich? |                                      |                                      |
|-------------------------------------------------------------------------------------------------------------------------|------------------------------------------|--------------------------------------|--------------------------------------|
|                                                                                                                         | gar nicht                                | stark                                | keine Angabe                         |
| Sie sitzen während eines gewöhnlichen Schultages im Unterricht.                                                         | <input type="radio"/> O <sub>0</sub>     | <input type="radio"/> O <sub>1</sub> | <input type="radio"/> O <sub>9</sub> |
| Sie tragen Ihre Schulsachen (z. B. Tasche, Ordner, Bücher/Tablet) während eines gewöhnlichen Schultages mit sich herum. | <input type="radio"/> O <sub>0</sub>     | <input type="radio"/> O <sub>1</sub> | <input type="radio"/> O <sub>9</sub> |
