# Supplementary material for: Focus group-supported development and psychometric exploration of an instrument to assess perceived physical exertion in nursing students
Source: PubMed Central journal article supplement (PMC11687016; doi:10.1186/s12912-024-02639-9), 2024-12-30
Supplement: 12912_2024_2639_MOESM3_ESM.pdf [file 12912_2024_2639_MOESM3_ESM.pdf]

## Questionnaire in English translation

| <b>Imagine the following activities in your everyday working life:</b>                                                      | <b>How much physically demanding is it for you?</b> |                |                |                |                |                |
|-----------------------------------------------------------------------------------------------------------------------------|-----------------------------------------------------|----------------|----------------|----------------|----------------|----------------|
|                                                                                                                             | Not at all                                          |                |                |                | Very much      | N/A            |
| You are positioning an immobile patient (approx. 80 kg) in bed without their help.                                          | O <sub>0</sub>                                      | O <sub>1</sub> | O <sub>2</sub> | O <sub>3</sub> | O <sub>4</sub> | O <sub>9</sub> |
| You are positioning an immobile patient with obesity (approx. 120 kg) in bed without their help.                            | O <sub>0</sub>                                      | O <sub>1</sub> | O <sub>2</sub> | O <sub>3</sub> | O <sub>4</sub> | O <sub>9</sub> |
| You are moving an immobile patient (approx. 80 kg) from bed to a wheelchair without their help.                             | O <sub>0</sub>                                      | O <sub>1</sub> | O <sub>2</sub> | O <sub>3</sub> | O <sub>4</sub> | O <sub>9</sub> |
| You are moving a partially mobile patient (approx. 80 kg) from bed to a wheelchair with their help.                         | O <sub>0</sub>                                      | O <sub>1</sub> | O <sub>2</sub> | O <sub>3</sub> | O <sub>4</sub> | O <sub>9</sub> |
| You are moving a partially mobile patient with obesity (approx. 120 kg) from bed to a wheelchair with their help.           | O <sub>0</sub>                                      | O <sub>1</sub> | O <sub>2</sub> | O <sub>3</sub> | O <sub>4</sub> | O <sub>9</sub> |
| You are moving a partially mobile patient (approx. 80 kg) from the ground to bed together with a second nurse after a fall. | O <sub>0</sub>                                      | O <sub>1</sub> | O <sub>2</sub> | O <sub>3</sub> | O <sub>4</sub> | O <sub>9</sub> |
| You are washing an immobile patient (approx. 80 kg) in bed without their help.                                              | O <sub>0</sub>                                      | O <sub>1</sub> | O <sub>2</sub> | O <sub>3</sub> | O <sub>4</sub> | O <sub>9</sub> |
| You are washing an immobile patient with obesity (approx. 120 kg) in bed without their help.                                | O <sub>0</sub>                                      | O <sub>1</sub> | O <sub>2</sub> | O <sub>3</sub> | O <sub>4</sub> | O <sub>9</sub> |
| You are assisting a partially mobile patient (approx. 80 kg) in body care in a narrow bathroom.                             | O <sub>0</sub>                                      | O <sub>1</sub> | O <sub>2</sub> | O <sub>3</sub> | O <sub>4</sub> | O <sub>9</sub> |
| You are emptying indwelling catheters of 8 patients one after another.                                                      | O <sub>0</sub>                                      | O <sub>1</sub> | O <sub>2</sub> | O <sub>3</sub> | O <sub>4</sub> | O <sub>9</sub> |
| You are putting on compression stockings on a patient (approx. 80 kg) in bed.                                               | O <sub>0</sub>                                      | O <sub>1</sub> | O <sub>2</sub> | O <sub>3</sub> | O <sub>4</sub> | O <sub>9</sub> |
| You are cleaning the wound of a patient (approx. 80 kg) in an area that is difficult to reach (e.g., calf, buttocks).       | O <sub>0</sub>                                      | O <sub>1</sub> | O <sub>2</sub> | O <sub>3</sub> | O <sub>4</sub> | O <sub>9</sub> |
| You are changing the bandage on a leg of a patient (approx. 80 kg) while holding up the leg.                                | O <sub>0</sub>                                      | O <sub>1</sub> | O <sub>2</sub> | O <sub>3</sub> | O <sub>4</sub> | O <sub>9</sub> |
| You are measuring the blood pressure of 20 patients one after another.                                                      | O <sub>0</sub>                                      | O <sub>1</sub> | O <sub>2</sub> | O <sub>3</sub> | O <sub>4</sub> | O <sub>9</sub> |
| You are connecting and disconnecting infusions of 20 patients one after another.                                            | O <sub>0</sub>                                      | O <sub>1</sub> | O <sub>2</sub> | O <sub>3</sub> | O <sub>4</sub> | O <sub>9</sub> |
| You are preparing the medication for 20 patients.                                                                           | O <sub>0</sub>                                      | O <sub>1</sub> | O <sub>2</sub> | O <sub>3</sub> | O <sub>4</sub> | O <sub>9</sub> |

|                                                                                                     |                                      |                                      |                                      |                                      |                                      |                                      |
|-----------------------------------------------------------------------------------------------------|--------------------------------------|--------------------------------------|--------------------------------------|--------------------------------------|--------------------------------------|--------------------------------------|
| You are putting clean sheets on an empty bed within 5 minutes.                                      | <input type="radio"/> O <sub>0</sub> | <input type="radio"/> O <sub>1</sub> | <input type="radio"/> O <sub>2</sub> | <input type="radio"/> O <sub>3</sub> | <input type="radio"/> O <sub>4</sub> | <input type="radio"/> O <sub>9</sub> |
| You are disinfecting the surfaces in a room (e.g., television, nurse call button) within 2 minutes. | <input type="radio"/> O <sub>0</sub> | <input type="radio"/> O <sub>1</sub> | <input type="radio"/> O <sub>2</sub> | <input type="radio"/> O <sub>3</sub> | <input type="radio"/> O <sub>4</sub> | <input type="radio"/> O <sub>9</sub> |
| You are standing in one place for 20 minutes (e.g., during surgery, while documentation).           | <input type="radio"/> O <sub>0</sub> | <input type="radio"/> O <sub>1</sub> | <input type="radio"/> O <sub>2</sub> | <input type="radio"/> O <sub>3</sub> | <input type="radio"/> O <sub>4</sub> | <input type="radio"/> O <sub>9</sub> |
| You are climbing the stairs over 2 floors.                                                          | <input type="radio"/> O <sub>0</sub> | <input type="radio"/> O <sub>1</sub> | <input type="radio"/> O <sub>2</sub> | <input type="radio"/> O <sub>3</sub> | <input type="radio"/> O <sub>4</sub> | <input type="radio"/> O <sub>9</sub> |
| You are transporting objects up to 5 kg (e.g., tea, towels, food trays) across the ward.            | <input type="radio"/> O <sub>0</sub> | <input type="radio"/> O <sub>1</sub> | <input type="radio"/> O <sub>2</sub> | <input type="radio"/> O <sub>3</sub> | <input type="radio"/> O <sub>4</sub> | <input type="radio"/> O <sub>9</sub> |
| You are transporting objects above 5 kg (e.g., luggage of a patient) from one ward to the next.     | <input type="radio"/> O <sub>0</sub> | <input type="radio"/> O <sub>1</sub> | <input type="radio"/> O <sub>2</sub> | <input type="radio"/> O <sub>3</sub> | <input type="radio"/> O <sub>4</sub> | <input type="radio"/> O <sub>9</sub> |
| You are pushing an empty bed across the ward.                                                       | <input type="radio"/> O <sub>0</sub> | <input type="radio"/> O <sub>1</sub> | <input type="radio"/> O <sub>2</sub> | <input type="radio"/> O <sub>3</sub> | <input type="radio"/> O <sub>4</sub> | <input type="radio"/> O <sub>9</sub> |
| You are pushing a patient in a wheelchair from one ward to the next.                                | <input type="radio"/> O <sub>0</sub> | <input type="radio"/> O <sub>1</sub> | <input type="radio"/> O <sub>2</sub> | <input type="radio"/> O <sub>3</sub> | <input type="radio"/> O <sub>4</sub> | <input type="radio"/> O <sub>9</sub> |
| You are lifting up objects up to 5 kg (e.g., carton with medication).                               | <input type="radio"/> O <sub>0</sub> | <input type="radio"/> O <sub>1</sub> | <input type="radio"/> O <sub>2</sub> | <input type="radio"/> O <sub>3</sub> | <input type="radio"/> O <sub>4</sub> | <input type="radio"/> O <sub>9</sub> |
| You are lifting up objects above 5 kg (e.g., rinsing solutions, oxygen bottles).                    | <input type="radio"/> O <sub>0</sub> | <input type="radio"/> O <sub>1</sub> | <input type="radio"/> O <sub>2</sub> | <input type="radio"/> O <sub>3</sub> | <input type="radio"/> O <sub>4</sub> | <input type="radio"/> O <sub>9</sub> |
| You are holding objects up to 5 kg (e.g., infusion bags) over 1 minute.                             | <input type="radio"/> O <sub>0</sub> | <input type="radio"/> O <sub>1</sub> | <input type="radio"/> O <sub>2</sub> | <input type="radio"/> O <sub>3</sub> | <input type="radio"/> O <sub>4</sub> | <input type="radio"/> O <sub>9</sub> |
| You are holding objects above 5 kg (e.g., rinsing solutions) over 1 minute.                         | <input type="radio"/> O <sub>0</sub> | <input type="radio"/> O <sub>1</sub> | <input type="radio"/> O <sub>2</sub> | <input type="radio"/> O <sub>3</sub> | <input type="radio"/> O <sub>4</sub> | <input type="radio"/> O <sub>9</sub> |

| <b>Imagine the following activities in your everyday school life:</b>                           | <b>How much physically demanding is it for you?</b> |                                      |                                      |
|-------------------------------------------------------------------------------------------------|-----------------------------------------------------|--------------------------------------|--------------------------------------|
|                                                                                                 | Not at all                                          | Very much                            | N/A                                  |
| You are sitting in class on a usual school day.                                                 | <input type="radio"/> O <sub>0</sub>                | <input type="radio"/> O <sub>1</sub> | <input type="radio"/> O <sub>9</sub> |
| You are carrying school things (e.g. bag, folder, books/tablet) with you on a usual school day. | <input type="radio"/> O <sub>0</sub>                | <input type="radio"/> O <sub>1</sub> | <input type="radio"/> O <sub>9</sub> |
