# Supplementary material for: Focus group-supported development and psychometric exploration of an instrument to assess perceived physical exertion in nursing students
Source: PubMed Central journal article supplement (PMC11687016; doi:10.1186/s12912-024-02639-9), 2024-12-30
Supplement: 12912_2024_2639_MOESM5_ESM.pdf [file 12912_2024_2639_MOESM5_ESM.pdf]

**Table 1:** Factor correlation matrix

| Factor | 1     | 2     | 3     |
|--------|-------|-------|-------|
| 1      | 1,000 | .694  | .094  |
| 2      | .694  | 1,000 | .262  |
| 3      | .094  | .262  | 1,000 |

Extraction method: Principal Axis Factoring

Rotation method: Promax with Kaiser-normalization
